# Supplementary material for: Low Hemoglobin Levels at Admission Are Independently Associated with Cognitive Impairment after Ischemic Stroke: a Multicenter, Population-Based Study
Source: Springer Nature journal article supplement (doi:10.1007/s12975-020-00785-1), 2020-02-10
Supplement: MOESM1 [file 17666614]

Low Hemoglobin Levels at Admission Are Independently Associated with Cognitive Impairment after Ischemic Stroke: A Multicenter, Population-Based Study

**Fanxia Meng1†, Shixin Zhang2†, Jie Yu1, Yi Chen3, Lunjie Luo4, Fangping He1, Ruili Wei1, Huaiwu Yuan1, Renjie Ji1, Hanfeng Chen1, Benyan Luo1, 5***

1Department of Neurology and Brain Medical Centre, First Affiliated Hospital, School of Medicine, Zhejiang University, Hangzhou 310003, China

2Zhejiang provincial center for disease control and prevention, Hangzhou 310051, China

3Hangzhou Hospital of Zhejiang General Corps of Armed Police Forces, Hangzhou 310051, China

4Department of Rehabilitation, First Affiliated Hospital, Zhejiang University, Hangzhou 310003, China

5Department of Neurology and Brain Medical Centre and Collaborative Innovation Center for Brain Science, First Affiliated Hospital, School of Medicine, Zhejiang University, Hangzhou 310003, China

†These authors have contributed to this work equally.

***Corresponding Author:**

Benyan Luo

Department of Neurology and Brain Medical Centre, First Affiliated Hospital, Collaborative Innovation Center for Brain Science, School of Medicine, Zhejiang University, Hangzhou, Zhejiang, 310003, China.

Email: [luobenyan@zju.edu.cn](mailto:luobenyan@zju.edu.cn)

Tel: (86) 571 8723 5101

Fax: (86) 571 8722 2061

Supplementary Material

**Supplementary Table 1** Patient Characteristics across Tertiles of Hb

| Variablesa | Tertiles of Hb (g/dl) | | | *P* |
| --- | --- | --- | --- | --- |
| Lowest Tertile (6.8-13.0) | Intermediate Tertile (13.1-14.4) | Highest Tertile (14.5-19.0) |
| *N*=920 | n=303 | n=292 | n=325 |  |
| Demographic characteristics |  |  |  |  |
| Age (year) | 62.59 ± 11.64 | 63.45 ± 11.32 | 59.85 ± 11.75 | <0.001 |
| Male (%) | 120 (39.60) | 198 (67.81) | 291 (89.54) | <0.001 |
| Education (year), median (IQR) | 6 (2-9) | 6 (5-9) | 6 (5-9) | <0.001 |
| Vascular risk factors |  |  |  |  |
| BMI (kg/m2) | 23.24 ± 2.95 | 23.59 ± 3.46 | 24.34 ± 3.11 | <0.001 |
| SBP at admission (mm Hg) | 146.40 ± 22.32 | 146.36 ± 20.55 | 146.03 ± 20.37 | 0.971 |
| DBP at admission (mm Hg) | 81.44 ± 12.14 | 84.34 ± 12.24 | 87.24 ± 13.93 | <0.001 |
| Current smoking (%) | 49 (16.17) | 76 (26.03) | 143 (44.00) | <0.001 |
| Current drinking (%) | 67 (22.11) | 97 (33.22) | 156 (48.00) | <0.001 |
| Hypertension (%) | 213 (70.30) | 190 (65.07) | 194 (59.69) | 0.021 |
| Diabetes mellitus (%) | 86 (28.38) | 71 (24.32) | 80 (24.62) | 0.442 |
| Hyperlipidemia (%) | 32 (10.56) | 21 (7.19) | 38 (11.69) | 0.155 |
| Atrial fibrillation (%) | 2 (0.66) | 5 (1.71) | 6 (1.85) | 0.389 |
| Previous ischemic cerebrovascular events (%) | 46 (15.18) | 49 (16.78) | 35 (10.77) | 0.082 |
| Creatinine (µmol/L), median (IQR) | 68.00 (57.00-83.00) | 70.00 (59.00-81.25) | 75.00 (65.00-87.00) | <0.001 |
| Total cholesterol (mmol/L) | 4.20 ± 1.07 | 4.30 ± 1.03 | 4.44 ± 1.04 | 0.019 |
| Low-density lipoprotein (mmol/L) | 2.44 ± 0.89 | 2.54 ± 0.88 | 2.61 ± 0.89 | 0.049 |
| Fasting blood glucose (mmol/L) | 5.51 ± 2.00 | 5.74 ± 2.13 | 6.16 ± 2.64 | 0.002 |
| Stroke characteristics |  |  |  |  |
| mRS score, median (IQR) | 2 (1-3) | 2 (1-3) | 2 (1-3) | 0.799 |
| NIHSS score, median (IQR) | 2 (1-5) | 2 (1-4) | 2 (1-4) | 0.617 |
| HAMD score, median (IQR) | 4 (1-9) | 4 (1-7) | 3 (1-7) | 0.025 |
| MMSE score | 22.55 ± 5.35 | 23.77 ± 5.42 | 25.04 ± 4.90 | <0.001 |
| MMSE score (≥26) (%) | 106 (34.98) | 137 (46.92) | 192 (59.08) | <0.001 |
| ADAS-cog score, median (IQR) | 14.00 (7.00-25.50) | 11.00 (6.30-21.75) | 9.00 (5.60-15.00) | <0.001 |

a Plus–minus values are means ±SD

Hb, hemoglobin; SD, standard deviation; IQR, inter quatile range; BMI, body mass index; SBP, systolic blood pressure; DBP, diastolic blood pressure; mRS, modified Rankin Scale; NIHSS, National Institutes of Health Stroke Scale; HAMD, Hamilton Depression Rating Scale; MMSE, Mini-Mental State Examination; ADAS-cog, Alzheimer’s Disease Assessment Scale-cognitive subscale

**Supplementary Table 2** Patient Characteristics across Tertiles of Hct

| Variablesa |  | Tertiles of Hct |  | *P* |
| --- | --- | --- | --- | --- |
| Lowest Tertile (22.6-39) | Intermediate Tertile (39.1-42.7) | Highest Tertile (42.8-56.8) |
| N=920 | n=305 | n=301 | n=314 |  |
| Demographic characteristics |  |  |  |  |
| Age (year) | 64.77 ± 11.81 | 63.88 ± 11.19 | 59.80 ± 11.77 | <0.001 |
| Male (%) | 137 (44.92) | 196 (65.12) | 276 (87.90) | <0.001 |
| Education (year), median (IQR) | 6 (3-9) | 6 (4-9) | 6 (5-9) | 0.017 |
| Vascular risk factors |  |  |  |  |
| BMI (kg/m2) | 23.26 ± 2.84 | 23.60 ± 3.50 | 24.34 ± 3.16 | <0.001 |
| SBP at admission (mm Hg) | 146.42 ± 21.18 | 145.24 ± 20.75 | 147.07 ± 21.28 | 0.55 |
| DBP at admission (mm Hg) | 82.23 ± 12.13 | 84.00 ± 12.35 | 86.92 ± 14.11 | <0.001 |
| Current smoking (%) | 55 (18.03) | 84 (27.91) | 129 (41.08) | <0.001 |
| Current drinking (%) | 76 (24.92) | 97 (32.23) | 147 (46.82) | <0.001 |
| Hypertension (%) | 215 (70.49) | 187 (62.13) | 195 (62.10) | 0.043 |
| Diabetes mellitus (%) | 92 (30.16) | 63 (20.93) | 82 (26.11) | 0.034 |
| Hyperlipidemia (%) | 25 (8.20) | 26 (8.64) | 40 (12.74) | 0.112 |
| Atrial fibrillation (%) | 3 (0.98) | 4 (1.33) | 6 (1.91) | 0.651 |
| Previous ischemic cerebrovascular events (%) | 49 (16.07) | 45 (14.95) | 36 (11.46) | 0.229 |
| Creatinine (µmol/L), median (IQR) | 69.00 (56.00-86.00) | 69.00 (59.00-81.00) | 75.00 (65.00-87.00) | <0.001 |
| Total cholesterol (mmol/L) | 4.15 ± 1.05 | 4.32 ± 1.01 | 4.48 ± 1.07 | <0.001 |
| Low-density lipoprotein (mmol/L) | 2.38 ± 0.88 | 2.54 ± 0.87 | 2.66 ± 0.91 | <0.001 |
| Fasting blood glucose (mmol/L) | 5.55 ± 2.04 | 5.78 ± 2.16 | 6.10 ± 2.62 | 0.011 |
| Stroke characteristics |  |  |  |  |
| mRS score, median (IQR) | 2 (1-3) | 2 (1-3) | 2 (1-3) | 0.896 |
| NIHSS score, median (IQR) | 2 (1-4) | 2 (1-4) | 2 (1-4) | 0.375 |
| HAMD score, median (IQR) | 4 (1-9) | 4 (1-8) | 4 (1-7) | 0.114 |
| MMSE score | 22.55 ± 5.49 | 23.93 ± 5.11 | 24.94 ± 5.08 | <0.001 |
| MMSE score (≥26) (%) | 110 (36.07) | 139 (46.18) | 186 (59.24) | <0.001 |
| ADAS-cog score, median (IQR) | 13.60 (7.00-26.30) | 11.85 (6.33-20.41) | 8.85 (5.00-15.09) | <0.001 |

a Plus–minus values are means ±SD

Hct, hematocrit, SD, standard deviation; IQR, inter quatile range; BMI, body mass index; SBP, systolic blood pressure; DBP, diastolic blood pressure; mRS, modified Rankin Scale; NIHSS, National Institutes of Health Stroke Scale; HAMD, Hamilton Depression Rating Scale; MMSE, Mini-Mental State Examination; ADAS-cog, Alzheimer’s Disease Assessment Scale-cognitive subscale

**Supplementary TABLE 3.** The MMSE scores in each domain across tertiles of Hb

| Variables (Total points) |  | Tertiles of Hb (g/dl) |  | *P* |
| --- | --- | --- | --- | --- |
| Highest tertile (14.5-19.0) | Intermediate tertile (13.1-14.4) | Lowest tertile (6.8-13.0) |
| Total MMSE scores (30) | 25.0 ± 4.9 | 23.8 ± 5.4 | 22.6 ± 5.3 | <0.001 |
| Orientation (10) | 9.0 ± 1.7 | 8.8 ± 2.0 | 8.6 ± 2.0 | <0.001 |
| Registration (3) | 2.9 ± 0.4 | 2.8 ± 0.5 | 2.8 ± 0.5 | <0.001 |
| Attention and calculation (5) | 3.8 ± 1.5 | 3.4 ± 1.7 | 3.1 ± 1.8 | <0.001 |
| Recall (3) | 2.1 ± 1.0 | 1.9 ± 1.1 | 1.9 ± 1.0 | 0.029 |
| Language (2) | 2.0 ± 0.1 | 1.9 ± 0.3 | 2.0 ± 0.2 | 0.061 |
| Repetition (4) | 3.5 ± 0.8 | 3.4 ± 1.0 | 3.2 ± 1.2 | 0.052 |
| Global CDR |  |  |  | <0.001 |
| 0 | 142 (46.0%) | 89 (34.5%) | 84 (31.6%) |
| 0.5 | 142 (46.0%) | 128 (49.6%) | 138 (51.9%) |
| ≥1 | 25 (8.1%) | 41 (15.9%) | 44 (16.5%) |

Continuous values are presented as the mean ± SD.

MMSE, Mini-Mental State Examination; Hb, hemoglobin; CDR, Clinical Dementia Rating; SD, standard deviation

**Supplementary TABLE 4.** Relationship between Hb levels and poststroke cognitive impairment (PSCI) in participants stratified by sex, age, and education levels

| Variables | OR (95%CI) | | | *P* for interaction |
| --- | --- | --- | --- | --- |
| Highest tertile | Intermediate tertile | Lowest tertile |
| Sex |  |  |  | 0.327 |
| Men | 1.00 | 1.17 (0.77, 1.77) | 1.93 (1.15, 3.26) * |
| Women | 1.00 | 1.93 (0.79, 4.75) | 1.95 (0.83, 4.59) |
| Age |  |  |  | 0.492 |
| <65 | 1.00 | 1.10 (0.67, 1.81) | 1.77 (0.98, 3.22) |
| ≥65 | 1.00 | 1.70 (0.97, 2.98) | 1.80 (0.99, 3.25) |
| Education level |  |  |  | 0.285 |
| Illiterate/primary | 1.00 | 1.01 (0.61, 1.69) | 1.61 (0.91, 2.83) |
| Middle school and above | 1.00 | 1.78 (1.02, 3.11)* | 1.80 (0.95, 3.39) |

All models were adjusted for age, sex, years of education, BMI, smoking status, TC and medical centers (excluding the stratifying factor).

**P*<0.05

Hb, hemoglobin; CI, confidence interval; OR, odds ratio; TC, total cholesterol; BMI, body mass index

**Supplementary TABLE 5.** β coefficients (95% Cls)) from linear regression and Tobit regression models for the association between baseline Hb levels and MMSE scores 4-6 years after stroke onset.

| 4-5 Years, n=215 | | | | | | |
| --- | --- | --- | --- | --- | --- | --- |
|  | β (95% CI) | | | Tobit β (95% CI) | | |
| per SD increase | per 1g/dl increase | *P* | per SD increase | per 1g/dl increase | *P* |
| Model 1 | 1.22 (0.50, 1.95) | 0.69 (0.28, 1.10) | 0.001 | 1.60 (0.74, 2.46) | 0.91 (0.42, 1.39) | <0.001 |
| Model 2 | 0.80 (0.05, 1.55) | 0.45 (0.03, 0.88) | 0.038 | 1.11 (0.24, 1.98) | 0.63 (0.14, 1.12) | 0.012 |
| >5 Years, n=115 | | | | | | |
| Model 1 | 0.75 (0.00, 1.50) | 0.43 (0.00, 0.85) | 0.052 | 0.90 (0.06, 1.74) | 0.51 (0.04, 0.98) | 0.035 |
| Model 2 | 0.47 (-0.32, 1.26) | 0.27 (-0.18, 0.72) | 0.242 | 0.60 (-0.26, 1.45) | 0.34 (-0.15, 0.82) | 0.170 |

Model 1: unadjusted model; Model 2: adjusted for sex, age and years of education.

MMSE, Mini-Mental State Examination; Hb, hemoglobin; SD, standard deviation; β, partial regression coefficient

**Supplementary TABLE 6.** A linear mixed-effects model for change over time of MMSE scores among patients with different baseline Hb levels.

| Variables | β | SE | *P* -value |
| --- | --- | --- | --- |
| Intercept | 23.28 | 0.35 | <0.001 |
| Hb | 1.36 | 0.49 | 0.005 |
| time | 0.20 | 0.07 | 0.004 |
| Hb by time | 0.21 | 0.10 | 0.024 |

MMSE, Mini-Mental State Examination; Hb, hemoglobin

**Supplementary TABLE 7.** A linear mixed-effects model adjusted for sex, age and years of education for change over time of MMSE scores among patients with different baseline Hb levels.

| Variables | β | SE | *P* -value |
| --- | --- | --- | --- |
| Intercept | 28.37 | 1.23 | <0.001 |
| Hb | 0.37 | 0.49 | 0.451 |
| time | 0.19 | 0.07 | 0.007 |
| Sex(male) | 0.67 | 0.47 | 0.153 |
| Age | -0.11 | 0.02 | <0.001 |
| Years of education | 0.24 | 0.04 | <0.001 |
| Hb by time | 0.21 | 0.09 | 0.025 |

MMSE, Mini-Mental State Examination; Hb, hemoglobin
